# Supplementary material for: Surface defect engineering: gigantic enhancement in the optical and gas detection ability of metal oxide sensor
Source: Royal Society of Chemistry journal article supplement (doi:10.1039/c6ra09033h), 2016-01-01
Supplement: c6ra09033h1.pdf [file c6ra09033h1.pdf]

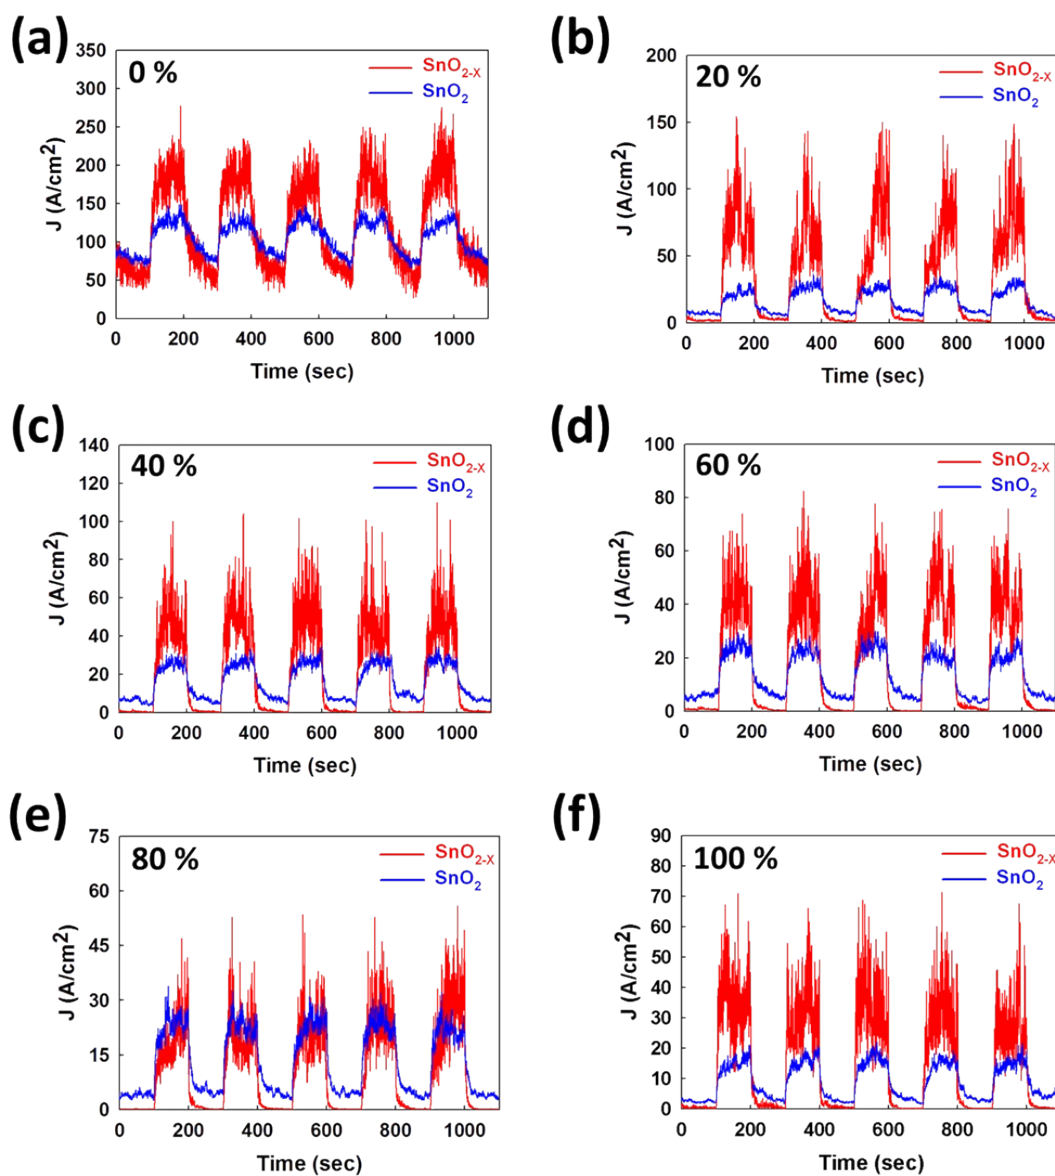

Figure S1. The UV (254nm) detection performance in different  $\text{O}_2$  concentration environment from (a) 0% to (f) 100%.

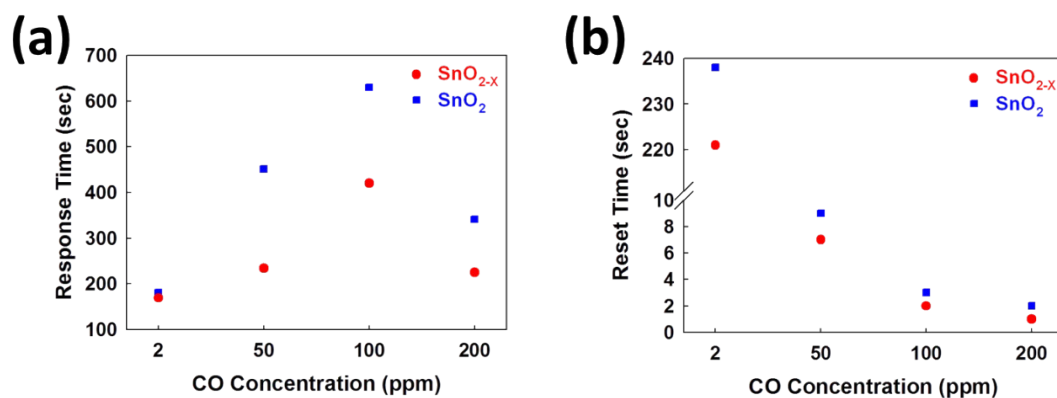

Figure S2. The trend of response (a) and reset time (b) in different CO concentration environment.

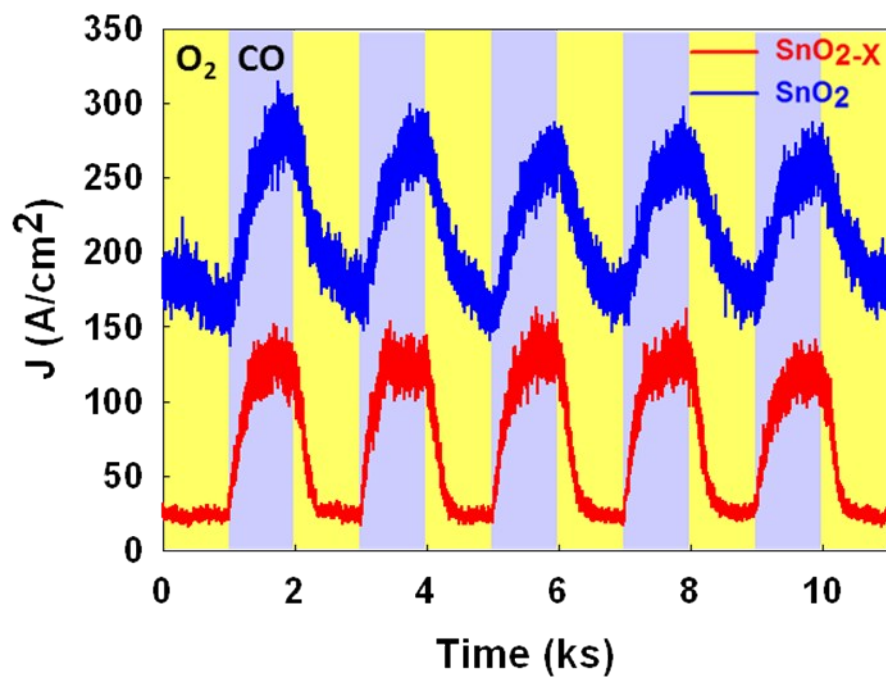

Figure S3. The repetition of both devices can be seen for 2 ppm CO detection.

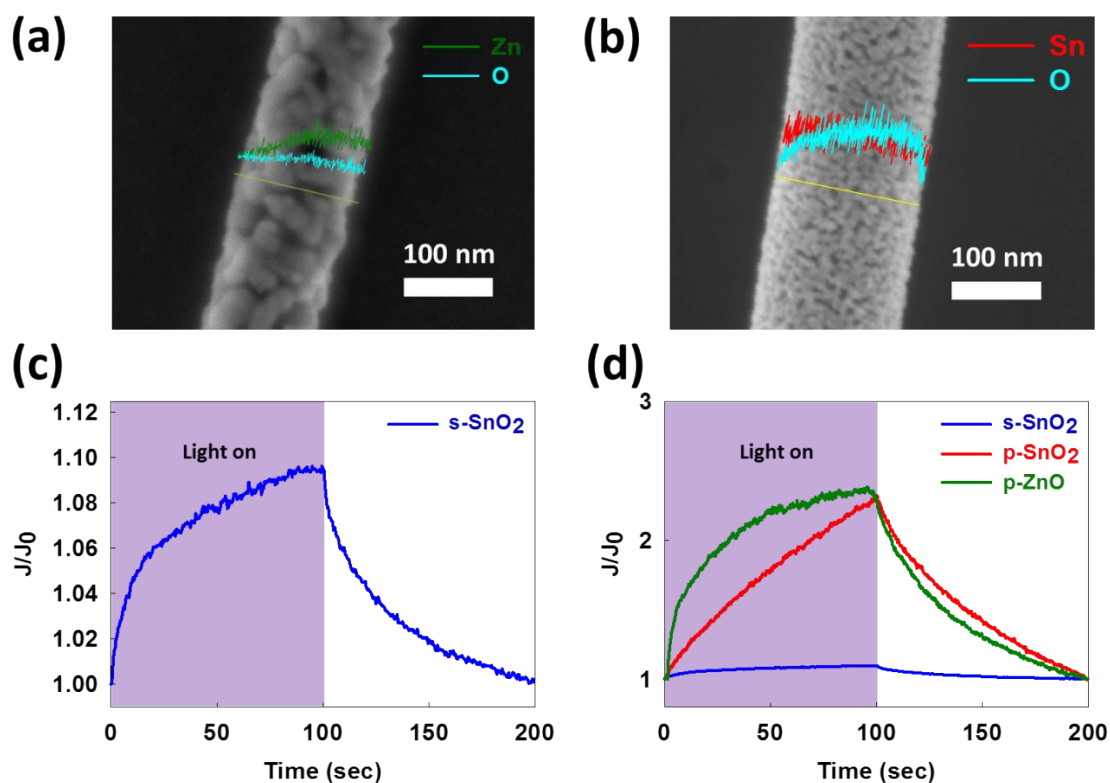

Figure S4. (a) and (b) show the SEM analyses of the p-ZnO and p-SnO<sub>2</sub> NWs. (c) Show the UV light sensing for single crystal SnO<sub>2</sub>. (d) Show the comparison with the UV light sensing of single crystal SnO<sub>2</sub>, polycrystalline SnO<sub>2</sub>, and polycrystalline ZnO. The sensitivity can be improved by increasing the number of defects. The sensitivities of s-SnO<sub>2</sub>, p-SnO<sub>2</sub> and p-ZnO devices are 9.4 %, 132.3 % and 130.7 %, respectively.

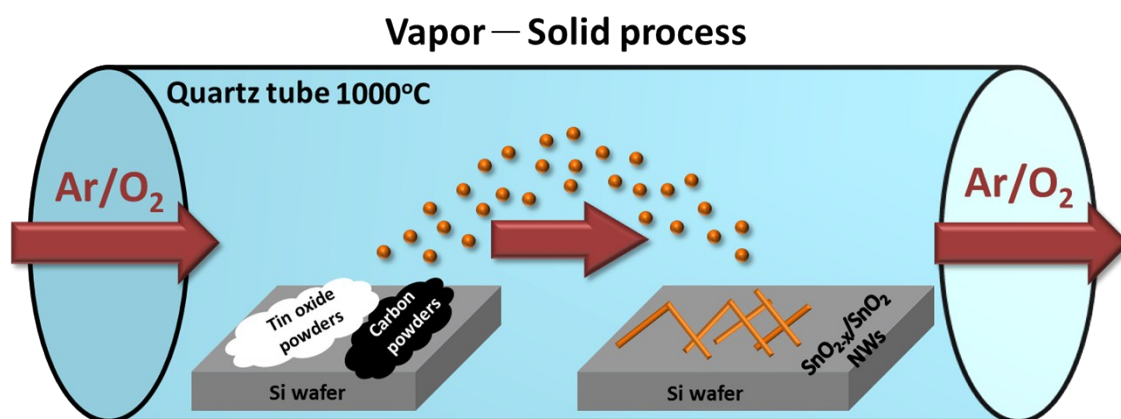

Figure S5. The sketch of the fabrication process can be seen.

**Table S1. The UV detection comparison with reported works is shown.**

| Sample                      | Sensitivity | Reference |
|-----------------------------|-------------|-----------|
| SnO <sub>2-x</sub> nanowire | 249.64 %    | This work |
| SnO <sub>2</sub> nanowire   | 142.84 %    | This work |
| SnO <sub>2</sub> nanowire   | 130 %       | 46        |
| ZnO nanowire films          | 900 %       | 45        |

**Table S2. The CO detection comparison with reported works is shown.**

| Sample                           | CO (ppm) | Response (R <sub>a</sub> /R <sub>g</sub> ) | Temperature (°C) | Reference |
|----------------------------------|----------|--------------------------------------------|------------------|-----------|
| SnO <sub>2-x</sub> nanowire      | 2        | 5.9 ± 0.43                                 | 200              | This work |
| SnO <sub>2</sub> nanowire        | 2        | 0.75 ± 0.07                                | 200              | This work |
| SnO <sub>2</sub> nanowire        | 5        | ≈ 1.05                                     | 295              | 25        |
| SnO <sub>2</sub> particle        | 20       | ≈ 2.2                                      | 250              | 19        |
| SnO <sub>2</sub> nanosheets      | 10       | ≈ 1.90                                     | 400              | 44        |
| ZnO nanowire with Au             | 50       | ≈ 1.85                                     | 350              | 52        |
| Anatase TiO <sub>2</sub> powders | 200      | ≈ 1.6                                      | 600              | 43        |
